# Supplementary material for: Metacognitive Beliefs and Suicidal Ideation: An Experience Sampling Study
Source: MDPI journal article supplement (doi:10.3390/ijerph182312336), 2021-11-24
Supplement: s1 [file s1]

**Supplementary Materials:**

**Table S1.** Full list of all ESM diary items and related construct.

| Diary instruction                                      | Diary item                                                     | Construct                       |
|--------------------------------------------------------|----------------------------------------------------------------|---------------------------------|
| Right now...                                           | I want to die                                                  | Suicidal ideation               |
|                                                        | I feel unhappy                                                 | Negative affect                 |
|                                                        | I feel anxious                                                 | Negative affect                 |
|                                                        | I feel powerless                                               | Defeat                          |
| Just before the text...                                | I was thinking about killing myself                            | Suicidal ideation               |
|                                                        | I was thinking about my failures and weaknesses                | Rumination                      |
|                                                        | I was analysing why I feel the way I do                        | Rumination                      |
|                                                        | I was worrying about what goes on in my head                   | Meta-worry                      |
|                                                        | I was worrying about the amount I worry                        | Meta-worry                      |
| Right now, how much do you agree with the following... | It is bad to have thoughts of killing myself                   | MCB*: Need to control thoughts  |
|                                                        | My suicidal thoughts persist, no matter how I try to stop them | Negative MCB: Uncontrollability |
|                                                        | I have no control over my suicidal thoughts                    | Negative MCB: Uncontrollability |
|                                                        | Thinking about suicide is dangerous for me                     | Negative MCB: Harm              |
|                                                        | If I don't stop my suicidal thoughts I will go mad             | Negative MCB: Harm              |
|                                                        | Thinking about suicide helps me cope                           | Positive MCB                    |
|                                                        | Thinking of ending it all gives me peace of mind               | Positive MCB                    |
|                                                        | I have a poor memory                                           | Cognitive Confidence            |
|                                                        | I think a lot about my suicidal thoughts                       | Cognitive Self-consciousness    |
|                                                        | I am constantly aware of my suicidal thoughts                  | Cognitive Self-consciousness    |
|                                                        | I look forward to the future                                   | Hopelessness                    |
|                                                        | Things don't work out the way I want                           | Hopelessness                    |
|                                                        | I am one of life's losers                                      | Defeat                          |
|                                                        | I am trapped in my situation                                   | Entrapment                      |
|                                                        | There are things in my life I want to escape                   | Entrapment                      |

*Article: Metacognitive beliefs and suicidal ideation: An experience sampling study*

|                                                                  |                                                                         |                        |
|------------------------------------------------------------------|-------------------------------------------------------------------------|------------------------|
| Since the last text, I have been responding to my thoughts by... | Dwelling on other worries                                               | TCS*: worry            |
|                                                                  | Focussing on other negative thoughts                                    | TCS: worry             |
|                                                                  | Getting angry at myself                                                 | TCS: punishment        |
|                                                                  | Telling myself that something bad will happen if I think those thoughts | TCS: punishment        |
|                                                                  | Doing something I enjoy                                                 | TCS: distraction       |
|                                                                  | Keeping myself busy                                                     | TCS: distraction       |
|                                                                  | Talking to a friend about the thought                                   | TCS: social            |
|                                                                  | Asking for reassurance                                                  | TCS: social            |
|                                                                  | Analysing my thoughts, rationally                                       | TCS: reappraisal       |
|                                                                  | Thinking about things in a different way                                | TCS: reappraisal       |
|                                                                  | Thinking I would be better off ending it all                            | TCS: suicidal ideation |

---

\*MCB = suicide-specific metacognitive beliefs

\*TCS = thought control strategy

[Response to items in blue were not analysed within the current study](#). These items were analysed in the study reported by Hallard, R., Wells, A., Aadahl, V., Emsley, R., & Pratt, D. (2021). Metacognition, rumination and suicidal ideation. An experience sampling test of the self-regulatory executive function model. *Psychiatry Research*, 303, 114083.
